# Supplementary material for: Depression as a Predictor of Weight Regain Among Successful Weight Losers in the Diabetes Prevention Program
Source: Oxford University Press journal article supplement (doi:10.2337/dc12-0293), 2012-09-23
Supplement: dc120293supplementarydata.pdf [file dc120293supplementarydata.pdf]

SUPPLEMENTARY DATA

List of DPPOS Research Group Investigators (Updated October 2011)

*Pennington Biomedical Research  
Center (Baton Rouge, LA)*

George A. Bray, MD\*  
Annie Chatellier, RN, CCRC\*\*  
Crystal Duncan, LPN  
Frank L. Greenway, MD  
Erma Levy, RD  
Donna H. Ryan, MD

*University of Chicago (Chicago, IL)*

Kenneth S. Polonsky, MD\*  
Janet Tobian, MD, PhD\*  
David Ehrmann, MD\*  
Margaret J. Matulik, RN, BSN\*\*  
Bart Clark, MD

Kirsten Czech, MS  
Catherine DeSandre, BA  
Ruthanne Hilbrich, RD  
Wylie McNabb, EdD  
Ann R. Semenske, MS, RD

*Jefferson Medical College  
(Philadelphia, PA)*

Barry J. Goldstein, MD, PhD\*  
Kevin Furlong, DO\*  
Kellie A. Smith, RN, MSN\*\*  
Wendi Wildman, RN\*\*  
Constance Pepe, MS, RD

*University of Miami (Miami, FL)*

Ronald B. Goldberg, MD\*  
Jeanette Calles, MSEd\*\*  
Juliet Ojito, RN\*\*  
Sumaya Castillo-Florez, MPH  
Hermes J. Florez, MD, PhD  
Anna Giannella, RD, MS  
Olga Lara  
Beth Veciana

*The University of Texas Health  
Science Center (San Antonio, TX)*

Steven M. Haffner, MD, MPH\*  
Helen P. Hazuda, PhD\*  
Maria G. Montez, RN, MSHP, CDE\*\*  
Carlos Lorenzo, MD, PhD  
Arlene Martinez, RN, BSN, CDE

*University of Colorado (Denver, CO)*

Richard F. Hamman, MD, DrPH\*  
Lisa Testaverde, MS\*\*  
Alexis Bouffard, MA, RN, BSN  
Dana Dabelea, MD, PhD  
Tonya Jenkins, RD, CDE

Dione Lenz, RN, BSN, CDE  
Leigh Perreault, MD  
David W. Price, MD  
Sheila C. Steinke, MS

*Joslin Diabetes Center (Boston, MA)*

Edward S. Horton, MD\*  
Catherine S. Poirier, RN, BSN\*\*  
Kati Swift, RN, BSN\*\*

Enrique Caballero, MD  
Sharon D. Jackson, MS, RD, CDE  
Lori Lambert, MS, RD, LD  
Kathleen E. Lawton, RN  
Sarah Ledbury, Med, RD

*VA Puget Sound Health Care System  
and University of Washington (Seattle,  
WA)*

Steven E. Kahn, MB, ChB\*  
Brenda K. Montgomery, RN, BSN,  
CDE\*\*

Wilfred Fujimoto, MD  
Robert H. Knopp, MD  
Edward W. Lipkin, MD  
Michelle Marr, BA  
Anne Murillo, BS  
Dace Trence, MD

*University of Tennessee (Memphis,  
TN)*

Abbas E. Kitabchi, PhD, MD, FACP\*  
Mary E. Murphy, RN, MS, CDE, MBA\*\*  
William B. Applegate, MD, MPH  
Michael Bryer-Ash, MD  
Samuel Dagogo-Jack, MD, MSc, FRCP,  
FACP

Sandra L. Frieson, RN  
Helen Lambeth, RN, BSN  
Lynne C. Lichtermann, RN, BSN  
Hooman Otkaei, MD  
Lily M.K. Rutledge, RN, BSN  
Amy R. Sherman, RD, LD  
Clara M. Smith, RD, MHP, LDN  
Judith E. Soberman, MD  
Beverly Williams-Cleaves, MD

*Northwestern University's Feinberg  
School of Medicine (Chicago, IL)*

Boyd E. Metzger, MD\*  
Mark E. Molitch, MD\*  
Mariana K. Johnson, MS, RN\*\*  
Mimi M. Giles, MS, RD

## SUPPLEMENTARY DATA

Diane Larsen, BS  
Charlotte Niznik, MS, RN, CDE  
Samsam C. Pen, BA  
Pamela A. Schinleber, RN, MS  
*Massachusetts General Hospital*  
*(Boston, MA)*  
David M. Nathan, MD\*  
Charles McKittrick, BSN\*\*  
Heather Turgeon, BSN\*\*  
Kathy Abbott  
Ellen Anderson, MS, RD  
Laurie Bissett, MS, RD  
Enrico Cagliero, MD  
Kali D'Anna  
Linda Delahanty, MS, RD  
Jose C. Florez, MD, PhD<sup>+</sup>  
Valerie Goldman, MS, RD  
Alexandra Poulos  
Beverly Tseng  
*University of California-San Diego*  
*(San Diego, CA)*  
Elizabeth Barrett-Connor, MD\*  
Mary Lou Carrion-Petersen, RN, BSN\*\*  
Javiva Horne, RD  
Diana Leos, RN, BSN  
Sundar Mudaliar, MD  
Jean Smith, RN  
Karen Vejvoda, RN, BSN, CDE, CCRC  
*St. Luke's-Roosevelt Hospital (New York, NY)*  
F. Xavier Pi-Sunyer, MD\*  
Jane E. Lee, MS\*\*  
Sandra T. Foo, MD  
Susan Hagamen, MS, RN, CDE  
*Indiana University (Indianapolis, IN)*  
David G. Marrero, PhD\*  
Susie M. Kelly, RN, CDE\*\*  
Ronald T. Ackermann, MD  
Edwin S. Fineberg, MD  
Angela Hadden  
Marcia A. Jackson  
Marion S. Kirkman, MD  
Kieren J. Mather, MD  
Paris J. Roach, MD  
Madelyn L. Wheeler, RD  
*Medstar Research Institute*  
*(Washington, DC)*  
Robert E. Ratner, MD\*

Vanita Aroda, MD\*  
Sue Shapiro, RN, BSN, CCRC\*\*  
Catherine Bavido-Arrage, MS, RD, LD  
Peggy Gibbs  
Gabriel Uwaifo, MD  
Renee Wiggins, RD  
*University of Southern California/UCLA Research Center*  
*(Alhambra, CA)*  
Mohammed F. Saad, MD\*  
Karol Watson, MD\*  
Medhat Botrous, MD\*\*  
Sujata Jinagouda, MD\*\*  
Maria Budget  
Claudia Conzues  
Perpetua Magpuri  
Kathy Ngo  
Kathy Xapthalamous  
*Washington University (St. Louis, MO)*  
Neil H. White, MD, CDE\*  
Samia Das, MS, MBA, RD, LD\*\*  
Ana Santiago, RD  
Angela L. Brown, MD  
Cormarie Wernimont, RD, LD  
*Johns Hopkins School of Medicine*  
*(Baltimore, MD)*  
Christopher D. Saudek, MD\* (deceased)  
Sherita Hill Golden, MD, MHS, FAHA\*  
Tracy Whittington, BS\*\*  
Jeanne M. Clark, MD  
Alicia Greene  
Dawn Jiggetts  
Henry Mosley  
John Reusing  
Richard R. Rubin, PhD  
Shawne Stephens  
Evonne Utsey  
*University of New Mexico*  
*(Albuquerque, NM)*  
David S. Schade, MD\*  
Karwyn S. Adams, RN, MSN\*\*  
Claire Hemphill, RN, BSN\*\*  
Penny Hyde, RN, BSN\*\*  
Lisa Butler, BUS  
Janene L. Canady, RN, CDE  
Kathleen Colleran, MD  
Ysela Gonzales, RN, MSN

## SUPPLEMENTARY DATA

Doris A. Hernandez-McGinnis  
Patricia Katz, LPN  
Carolyn King  
*Albert Einstein College of Medicine*  
*(Bronx, NY)*  
Jill Crandall, MD\*  
Janet O. Brown, RN, MPH, MSN\*\*  
Elsie Adorno, BS  
Helena Duffy, MS, C-ANP  
Helen Martinez, RN, MSN, FNP-C  
Dorothy Pompei, BA  
Harry Shamoon, MD  
Elizabeth A. Walker, RN, DNSc, CDE  
Judith Wylie-Rosett, EdD, RD  
*University of Pittsburgh (Pittsburgh,*  
*PA)*  
Trevor Orchard, MD\*  
Susan Jeffries, RN, MSN\*\*  
M. Kaye Kramer, BSN, MPH\*\*  
Marie Smith, RN, BSN\*\*  
Rena R. Wing, PhD  
Andrea Kriska, PhD  
Jessica Pettigrew, CMA  
Linda Semler, MS, RD  
Elizabeth Venditti, PhD  
Valarie Weinzierl, BS  
*University of Hawaii (Honolulu, HI)*  
Richard F. Arakaki, MD\*  
Narleen K. Baker-Ladao, BS\*\*  
Mae K. Isonaga, RD, MPH\*\*  
Nina E. Bermudez, MS  
Marjorie K. Mau, MD  
*Southwest American Indian Centers*  
*(Phoenix, AZ; Shiprock, NM; Zuni,*  
*NM)*  
William C. Knowler, MD, DrPH\*<sup>†</sup>  
Norman Coeoyate\*\*  
Mary A. Hoskin, RD, MS\*\*  
Camille Natewa\*\*  
Carol A. Percy, RN, MS\*\*  
Kelly J. Acton, MD, MPH  
Vickie L. Andre, RN, FNP  
Shandiin Begay, MPH  
Brian C. Bucca, OD, FAAO  
Sherron Cook  
Matthew S. Doughty, MD  
Justin Glass, MD  
Martia Glass, MD

Robert L. Hanson, MD, MPH  
Doug Hassenpflug, OD  
Louise E. Ingraham, MS, RD, LN  
Kathleen M. Kobus, RNC-ANP  
Jonathan Krakoff, MD  
Catherine Manus, LPN  
Cherie McCabe  
Sara Michaels, MD  
Tina Morgan  
Julie A. Nelson, RD  
Robert J. Roy  
Miranda Smart  
Darryl P. Tonemah, PhD  
Charlton Wilson, MD  
*George Washington University*  
*Biostatistics Center (DPP*  
*Coordinating Center Rockville, MD)*  
Sarah Fowler, PhD\*  
Tina Brenneman\*\*  
Solome Abebe, MS  
Julie Bamdad, MS  
Melanie Barkalow  
Joel Bethepu  
Tsedenia Bezabeh  
Jackie Callaghan  
Costas Christophi, PhD  
Sharon L. Edelstein, ScM  
Yuping Gao  
Robert Gooding  
Adrienne Gottlieb  
Nisha Grover  
Heather Hoffman, PhD  
Kathleen Jablonski, PhD  
Richard Katz, MD  
Preethy Kolinjivadi, MS  
John M. Lachin, ScD  
Yong Ma, PhD  
Susan Reamer  
Alla Sapozhnikova  
Hanna Sherif, MS  
Marinella Temprosa, MS  
Qing Pan, PhD  
Mary Foulkes, PhD  
Nicole Butler  
*Lifestyle Resource Core*  
Elizabeth M. Venditti, PhD\*  
Andrea M. Kriska, PhD  
Linda Semler, MS, RD

## SUPPLEMENTARY DATA

Valerie Weinzierl, BS

Central Biochemistry Laboratory

(Seattle, WA)

Santica Marcovina, PhD, ScD\*

Greg Strylewicz, PhD\*\*

John Albers, PhD

Epidemiological Cardiology Research

Center- Epicare (Winston-Salem, NC)

Ronald J. Prineas, MD, PhD\*

Teresa Alexander

Charles Campbell, MS

Sharon Hall

Susan Hensley

Yabing Li, MD

Margaret Mills

Elsayed Soliman, MD

Zhuming Zhang, MD

NIH/NIDDK (Bethesda, MD)

Judith Fradkin, MD

Sanford Garfield, PhD

Centers for Disease Control &

Prevention (Atlanta, GA)

Edward Gregg, PhD

Ping Zhang, PhD

University of Michigan (Ann Arbor,

MI)

William H. Herman, MD, MPH

\* denotes Principal Investigator

\*\* denotes Program Coordinator
